# Supplementary material
Source: PubMed Central journal article supplement (PMC4523101)
Supplement: Supp_Figure1.pdf [file Supp_Figure1.pdf]

## Supplementary Data

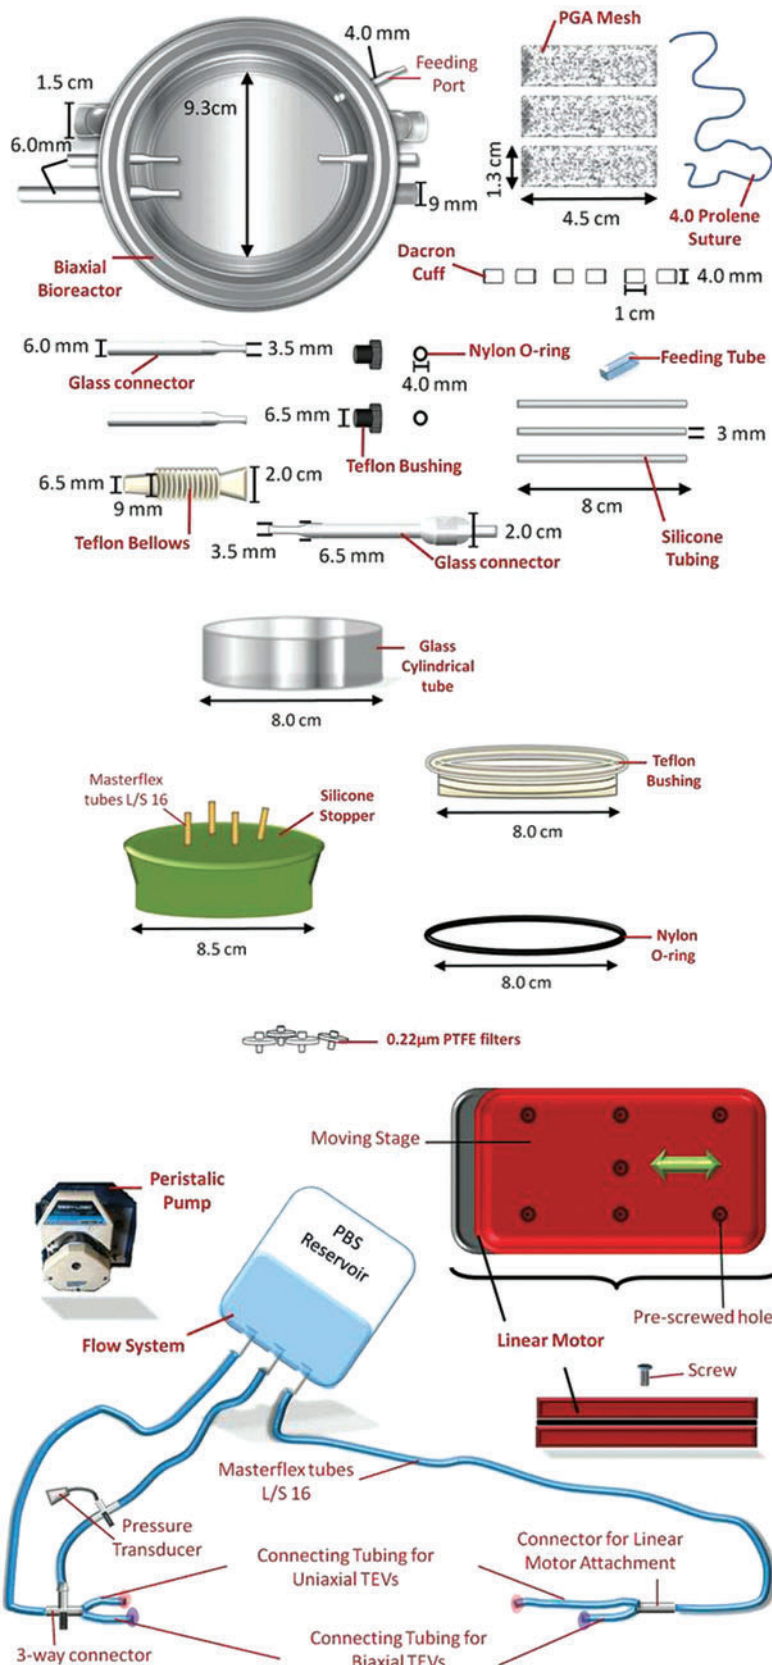

**SUPPLEMENTARY FIG. S1.** List of all individual parts of the biaxial bioreactor system.
