# Supplementary material
Source: PubMed Central journal article supplement (PMC4523101)
Supplement: Supp_Figure2.pdf [file Supp_Figure2.pdf]

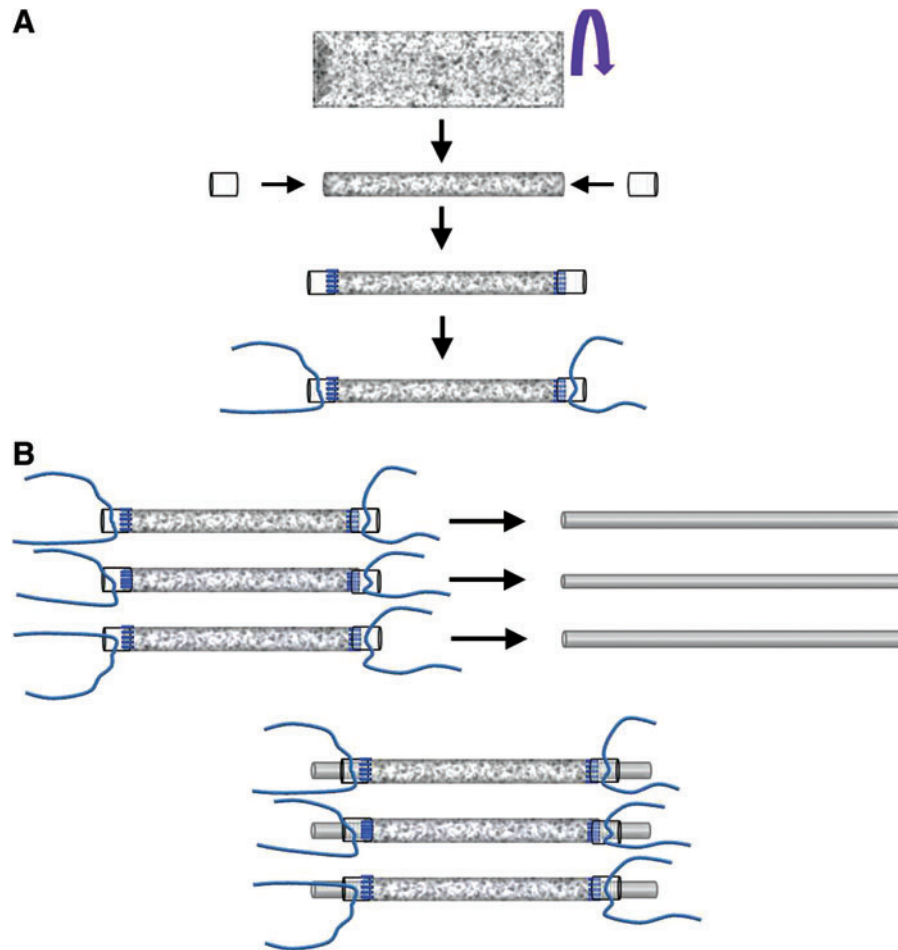

**SUPPLEMENTARY FIG. S2.** Tubular polyglycolic acid (PGA) scaffold fabrication. **(A)** Construction of tubular PGA scaffolds with Dacron cuffs at the two ends using a 4.0 Prolene suture. **(B)** Insertion of silicone tubing inserted into lumens of PGA scaffolds.
