# Supplementary material
Source: PubMed Central journal article supplement (PMC4523101)
Supplement: Supp_Figure3.pdf [file Supp_Figure3.pdf]

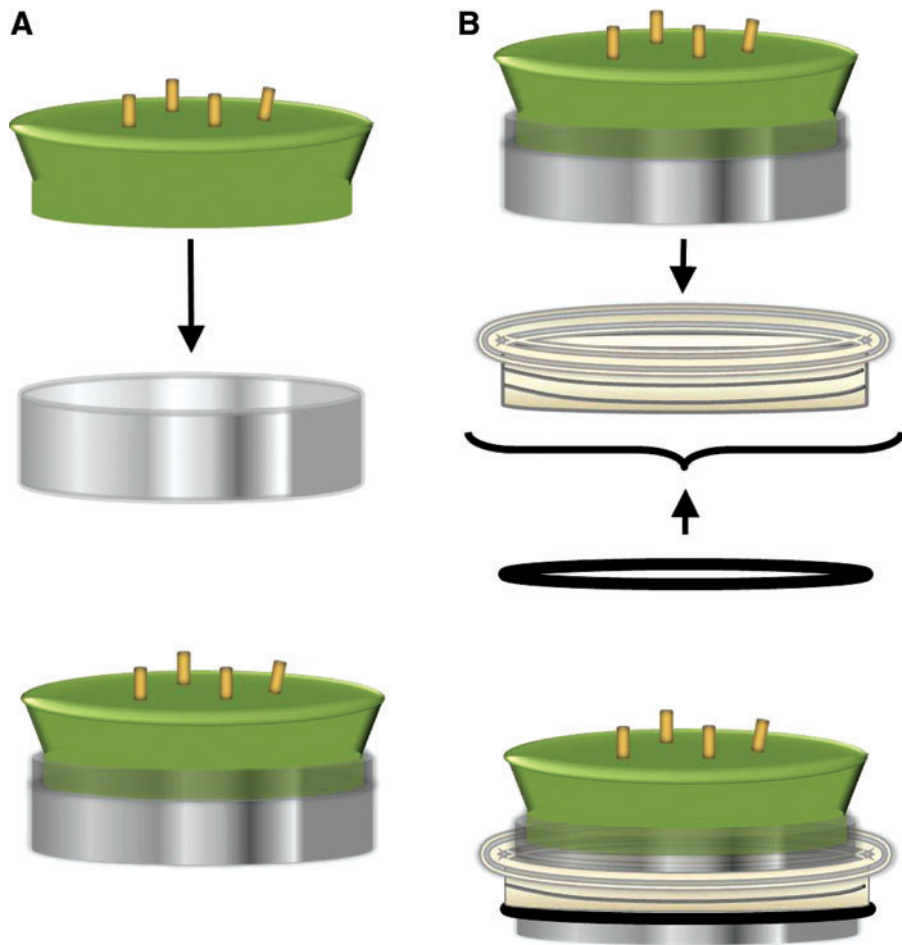

**SUPPLEMENTARY FIG. S3.** Bioreactor cap assembly. (A) A silicone stopper with tubing for air filters is inserted into a glass cylinder. (B) The whole unit is fitted into a Teflon bushing and an O-ring is pulled over the glass cylinder from the *bottom*.
