# Supplementary material
Source: PubMed Central journal article supplement (PMC4523101)
Supplement: Supp_Figure4.pdf [file Supp_Figure4.pdf]

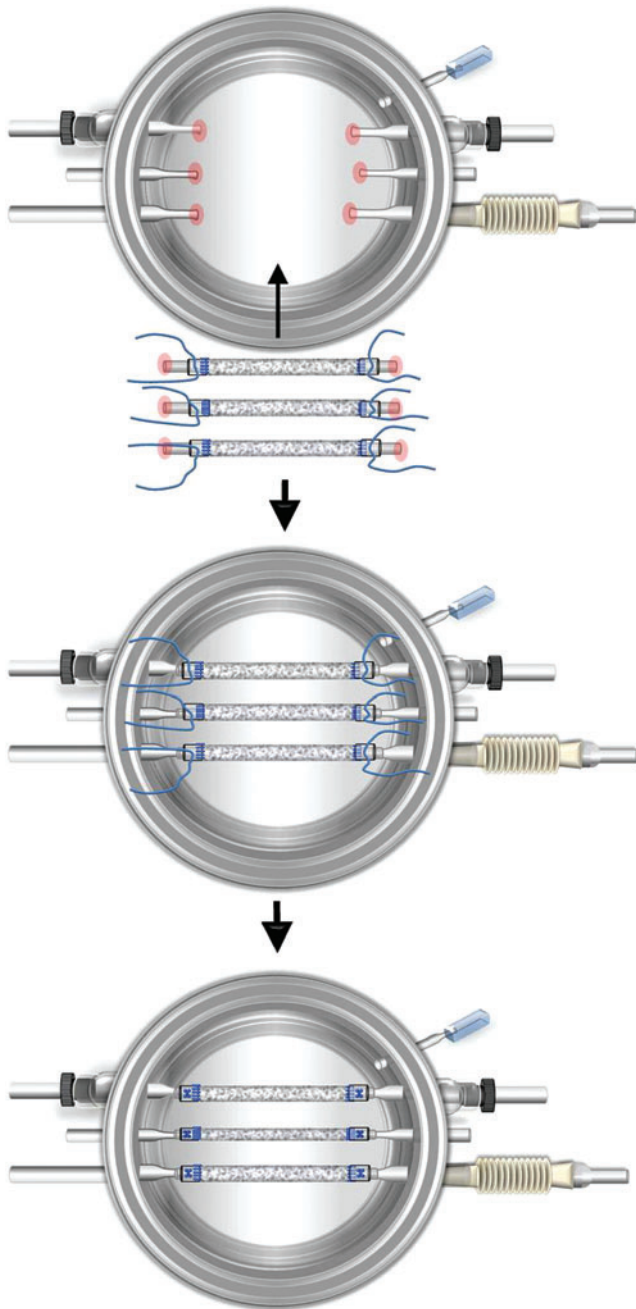

**SUPPLEMENTARY FIG. S4.** Mounting of PGA scaffolds onto the biaxial bioreactor. The two ends of silicone tubing of PGA scaffolds are pulled over the flared ends of glass connectors inside the bioreactor. The ends of silicone tubing and flared ends of the glass connectors are highlighted in *pink* to mark the points of attachment. 4.0 Prolene sutures on Dacron cuffs are tied over the flared ends to secure Dacron cuffs to two sides of the bioreactor.
